# Supplementary material for: Light Increases Energy Transfer Efficiency in a Boreal Stream
Source: PLoS One. 2014 Nov 20;9(11):e113675. doi: 10.1371/journal.pone.0113675 (PMC4239105; doi:10.1371/journal.pone.0113675)
Supplement: Table S2 — Data obtained in the field experiment. (XLSX) [file pone.0113675.s003.xlsx]

## Sheet: Sheet1
PLoS One │ Supporting Information Light increases energy transfer efficiency in a boreal stream Jūratė Lesutienė, Elena Gorokhova, Daiva Stankevičienė, Eva Bergman and Larry Greenberg
Table S2. Data obtained in the field experiment. Treatments: HL -high light, LL - low light;
nutrients: P- phosphorus, N- nitrogen added, C - not added.
Light	Nutrients	Chl a, µg cm-2	C, μg cm-2	N, μg cm-2	P, μg cm-2	N:P	C:N	C:P	AFDW, mg cm-2	δ13C, ‰
LL	PN	0.462684	127.522	13.1078	1.01995	28.4566	11.3502	322.989	0.682213	-0.646484
LL	N	0.673791	480.594	44.7447	1.60747	61.6356	12.5309	772.352	1.70132	1.27845
LL	C	1.78657	255.915	29.1462	1.45707	44.2929	10.2438	453.728	1.10895	0.403332
LL	C	0.780985	319.05	33.4971	3.38832	21.8905	11.1122	243.251	0.972785	6.87672
LL	C	2.57266	763.584	79.7776	2.59606	68.0456	11.1667	759.841	2.31896	5.77117
LL	C	0.525032	126.684	14.8478	0.740234	44.4148	9.95421	442.114	0.557983	4.35041
LL	P	1.01178	166.816	20.9068	1.58762	29.1592	9.30889	271.439	0.915934	65.4435
LL	N	0.73942	157.238	17.8274	1.32624	29.7645	10.29	306.278	0.72994	37.7325
LL	P	2.65797	401.39	41.8217	2.05927	44.9699	11.1973	503.539	2.04664	13.9382
LL	P	0.599411	117.78	14.3816	0.923093	34.4982	9.55456	329.615	1.16861	33.9836
LL	N	0.675978	145.997	16.3856	0.809391	44.8268	10.3951	465.978	0.555877	20.4734
LL	PN	0.764577	138.902	15.4195	0.953045	35.8254	10.5095	376.508	0.517977	30.5226
LL	PN	1.81311	389.066	38.7853	2.73657	31.383	11.7031	367.279	1.356	8.98657
LL	PN	0.885991	211.879	23.6727	1.18756	44.1396	10.4421	460.909	0.955414	11.3906
LL	N	0.861927	145.876	16.3119	0.976996	36.9695	10.4335	385.72	0.320051	14.14
LL	P	0.649727	178.438	18.984	0.821814	51.1503	10.966	560.912	0.543244	21.8194
HL	N	0.659206	171.509	19.7889	0.822025	53.3054	10.1114	538.991	0.71871	96.4947
HL	C	1.21997	255.882	28.2603	1.75003	35.7573	10.5636	377.724	0.978681	34.7031
HL	PN	0.539616	294.644	31.4257	1.81081	38.4277	10.9386	420.344	0.642207	96.8033
HL	PN	0.364605	98.844	11.5872	0.976295	26.2804	9.95217	261.547	0.421119	143.333
HL	PN	2.64412	1068.51	93.6002	3.95747	52.3713	13.3183	697.498	2.94783	5.86006
HL	C	3.15019	264.226	28.3736	4.4268	14.1925	10.8645	154.194	1.83818	-18.4647
HL	P	0.909617	162.992	18.3714	0.970914	41.8982	10.3507	433.676	0.591251	48.3118
HL	P	0.857552	149.3	17.3516	1.63057	23.5631	10.0385	236.538	0.550262	62.007
HL	P	0.989356	242.626	26.2527	1.33521	43.5369	10.7823	469.427	0.833816	51.0552
HL	N	1.9984	416.603	40.7874	2.0851	43.3144	11.9163	516.15	1.31179	4.21551
HL	PN	1.23328	181.178	23.5368	1.59686	32.6373	8.98058	293.102	0.75275	43.4445
HL	P	1.39133	443.022	37.9012	1.68672	49.7557	13.637	678.52	1.48234	30.6152
HL	C	0.469247	113.686	12.7745	1.39819	20.2307	10.3827	210.049	0.409187	21.2052
HL	N	0.940682	145.771	17.0706	1.655	22.8394	9.96248	227.537	0.575529	30.2782
HL	C	1.33737	737.746	70.0466	2.47618	62.638	12.2876	769.67	1.97505	-3.67774
HL	N	1.22814	192.86	21.13	1.2781	36.6075	10.6485	389.816	0.633784	28.4376
